# Supplementary material for: Use of medical services and medicines attributable to type 2 diabetes care in Yaoundé, Cameroon: a cross-sectional study
Source: Springer Nature journal article supplement (doi:10.1186/s12913-017-2197-0), 2017-04-11
Supplement: MOESM1 [file 12213002]

**ILLNESS IMPACT INTERVIEW**

|                                         |      |                                   |      |
|-----------------------------------------|------|-----------------------------------|------|
| Study Code (usually, Country)           | SC   | Interviewer code                  | IC   |
| Region/Province                         | L1   | Checked by:                       | CK   |
| District                                | L2   | Data Entry Clerk code:            | DE1  |
| City/Town/Village                       | L3   | 2 <sup>nd</sup> Data Entry Clerk: | DE2  |
| Ward/Street                             | L4   | Case=1, Control =2:               | CASE |
| Language Code                           | LANG | Surrogate? Y=1, N=0               | SUR  |
| <b>Respondent Telephone:</b>            | TEL  | <b>Respondent ID:</b>             | ID   |
| <b>Respondent Family Name(Surname):</b> |      |                                   | FN   |
| <b>Respondent Personal Names:</b>       |      |                                   | PN   |

**DOI: Date of interview:** -- DOI  
Day Month Year

**STIM: Starting time:** : STIM  
24 hour clock Hour Minutes

**LOC: Location of Residence** 1 Capital city / 2 Other city / 3 Town / 4 Countryside / 5 Isolated countryside

LOC

**SEX:** 1 Male/ 2 Female  SEX

**MAR: Marital status** 1 Single / 2 Married / 3 Widowed / 4 Separated or Divorced / 5 Cohabiting / 66 Other

MAR

**AGE: Age in years or midpoint of range:**  AGE

**DOB: Date of Birth:** -- DOB  
Day Month Year

Enter 01 if day not know and/or if month not known

**DM1: Has a doctor or health practitioner ever told you that you have diabetes?** 1 Yes / 2 No / 8 Don't Know / 9 Refused

DM1

**TERM: IF RESPONDENT IS A CONTROL AND ANSWERS YES, TERMINATE STUDY** 1 Terminate / 2 Continue

TERM

**WRK: Which of the following statements best describes your work situation?**

1 Yes / 2 No / 8 Don't know / 9 Refused

| WORK TYPE                                                                                     | RESPONSE |
|-----------------------------------------------------------------------------------------------|----------|
| I work only around the home stead (childcare, cooking, cleaning, take care of livestock etc.) | WRK1     |
| I am a small scale farmer                                                                     | WRK2     |
| I am self-employed but not as a farmer                                                        | WRK3     |
| I am on formal employment (for salary or wages from a single employer) in the public sector   | WRK4     |
| I am on formal employment in the private sector (includes NGOs)                               | WRK5     |
| I am not working because I am not able to work due to my health condition                     | WRK6     |
| I am not working and looking for work                                                         | WRK7     |
| I am retired or a pensioner                                                                   | WRK8     |

**WTH: Does your household own any of the following items?**

1 Yes / 2 No / 8 Don't know / 9 Refused

Note: Household means all the people that eat together with the respondent

| ITEMS OWNED                      | RESPONSE |
|----------------------------------|----------|
| Car                              | WTH1     |
| Motorcycle                       | WTH2     |
| Bicycle                          | WTH3     |
| Refrigerator                     | WTH4     |
| TV set                           | WTH5     |
| Computer                         | WTH6     |
| Fixed line telephone             | WTH7     |
| Mobile/cellular phone            | WTH8     |
| Micro-wave                       | WTH9     |
| Electric cooker                  | WTH10    |
| House connected with electricity | WTH11    |
| Piped water                      | WTH12    |
| Flush toilet                     | WTH13    |
| Stone/brick walls                | WTH14    |
| Roofing tiled house              | WTH15    |

**INET: How many people normally eat together with you where you live?**

|\_|\_| INET

**INCM: Taking those who eat with you as your household, what is your household's monthly income from all sources?**

Income includes all money and goods from all sources.

(8 Don't know/ 9 Refused)

|\_|\_|\_|\_|\_|\_|\_|\_| INCM

**SCH: What is the highest level of school that you have completed?**

1 No formal school of any kind / 2 Dropped out in Primary school / 3 Finished Primary school / 4 Dropped out in Secondary school / 5 Finished Secondary school / 6 Trade school or apprenticeship (e.g., hair dressing, mechanic) / 7 Dropped out of University / 8 Finished University

|     |
|-----|
| SCH |
|-----|

**HEALTH UTILITY INDEX**

Read: **Now I want to ask about various aspects of your health. When answering these questions we would like you to think about your health and your ability to do things on a day to day basis, during the past week. You may feel that some of these questions do not apply to you, but it is important that we ask the same questions of everyone.**

Read: **To define the 1 week period, please think about what the date was 7 days ago and recall the major events that you have experienced during this period. Please focus your answers on your abilities, disabilities and how you have felt during the past 1 week. There are no rights or wrong answers; what we want is your opinion about your abilities and feelings.**

**VISION** / Read the entire sentence, emphasizing the words in italics. DO NOT read the response options.

**HU1: During the past week, have you been able to see well enough to read ordinary newsprint [or Bible or Qu’ran] *without* glasses or contact lenses?** 1 Yes (*Go to HU4*) / 2 No / 3 Don’t know / 4 Refused

|     |
|-----|
| HU1 |
|-----|

**HU2: Have you been able to see well enough to read ordinary newsprint [OR BIBLE OR QU’RAN] with glasses or contact lenses?** 1 Yes (*Go to HU4*) / 2 No / 3 Don’t know / Did not wear glasses or contact lenses / 4 Refused

|     |
|-----|
| HU2 |
|-----|

**HU3: During the past week, have you been able to see at all?** 1 Yes / 2 No (*Go to HU6*) / 3 Don’t know / 4 Refused

|     |
|-----|
| HU3 |
|-----|

**HU4: During the past week, have you been able to see well enough to recognize a friend on the other side of the street *without* glasses or contact lenses?** 1 Yes (*Go to HU6*) / 2 No / 3 Don’t know / 4 Refused

|     |
|-----|
| HU4 |
|-----|

**HU5: Have you been able to see well enough to recognize a friend on the other side of the street with glasses or contact lenses?** 1 Yes / 2 No (*Go to HU6*) / 3 Don’t know/ Did not wear glasses or contact lenses / 4 Refused

|     |
|-----|
| HU5 |
|-----|

**HEARING**

**HU6: During the past week, have you been able to hear what is said in a group conversation with at least three people *without* a hearing aid** 1 Yes (*Go to HU11*) / 2 No / 3 Don't know / 4 Refused

HU6

**HU7: Have you been able to hear what is said in a group conversation *with* at least three other people with a hearing aid?** 1 Yes (*Go to HU9*) / 2 No / 3 Don't know/didn't wear a hearing aid / 4 Refused

HU7

**HU8: During the past week, have you been able to hear at all?** 1 Yes / 2 No (*Go to HU11*) / 3 Don't know / 4 Refused

HU8

**HU9: During the past week, have you been able to hear what is said in a conversation with one other person in a quiet room *without* a hearing aid?** 1 Yes (*Go to HU11*) / 2 No / 3 Don't know / 4 Refused

HU9

**HU10: Have you been able to hear what is said in a conversation with one other person in a quiet room *with* a hearing aid?** 1 Yes / 2 No / 3 Don't know/didn't wear a hearing aid / 4 Refused

HU10

**SPEECH**

**HU11: During the past week, have you been able to be understood *completely* when speaking your own language with people who do not know you?** 1 Yes (*Go to HU16*) / 2 No / 3 Don't know / 4 Refused

HU11

**HU12: Have you been able to be understood *partially* when speaking with people who do not know you** 1 Yes / 2 No / 3 Don't know / 4 Refused

HU12

**HU13: During the past week, have you been able to be understood *completely* when speaking with people *who know you well*?** 1 Yes (*Go to HU16*) / 2 No / 3 Don't know / 4 Refused

HU13

**HU14: Have you been able to be understood *partially* when speaking with people who know you well?** 1 Yes (*Go to HU16*) / 2.No / 3 Don't know / 4 Refused

HU14

**HU15: During the past week, have you been able to speak at all?** 1 Yes / 2 No / 3 Don't know / 4 Refused

HU15

**GETTING AROUND**

**HU16:** During the past week, have you been able to bend, lift, jump and run *without difficulty and without help or equipment of any kind?* 1 Yes (*Go to HU24*) / 2 No / 3 Don't know / 4 Refused

HU16

**HU17:** Have you been able to walk around the neighborhood *without difficulty and without help or equipment of any kind?* 1 Yes (*Go to HU24*) / 2 No / 3 Don't know / 4 Refused

HU17

**HU18:** Have you been able to walk around the neighborhood *with difficulty but without help or equipment of any kind?* 1 Yes (*Go to HU24*) / 2 No / 3 Don't know / 4 Refused

HU18

**HU19:** During the past week, have you been able to walk at all 1 Yes/ 2 No (*Go to HU22*) / 3 Don't know / 4 Refused

HU19

**HU20:** Have you needed mechanical support, such as braces or a cane or crutches, to be able to walk around the neighborhood? 1 Yes/ 2 No/ 3 Don't know/ 4 Refused

HU20

**HU21:** Have you needed the help of another person to walk? 1 Yes/ 2 No/ 3 Don't know/ 4 Refused

HU21

**HU22:** Have you needed a wheelchair to get around the neighborhood? 1 Yes/ 2 No/ 3 Don't know/ 4 Refused

HU22

**HU23:** Have you needed the help of another person to get around in the wheelchair? 1 Yes/ 2 No/ 3 Don't know / 4 Refused

HU23

**HANDS and FINGERS**

**HU24:** During the past week, have you had the *full use* of both hands and ten fingers? 1 Yes (*Go to HU28*) / 2 No / 3 Don't know / 4 Refused

HU24

**HU25:** Have you needed the help of another person because of limitations in the use of your hands or fingers? 1 Yes/ 2 No (*Go to HU27*) / 3 Don't know / 4 Refused

HU25

**HU26:** Have you needed the help of another person with some tasks, most tasks, or all tasks? 1 Some tasks/ 2 Most tasks/ 3 All tasks/ 4 Don't know 5 Refused

HU26

**HU27:** Have you needed special equipment, for example special tools to help with dressing or eating, because of limitations in the use of your hands or fingers 1 Yes/ 2 No/ 3 Don't know / 4 Refused

HU27

**SELF CARE**

**HU28: During the past week, have you been able to eat, bathe, dress and use the toilet without difficulty?**  
1 Yes (*Go to HU31*) / 2 No / 3 Don't know / 4 Refused

HU28

**HU29: Have you needed the help of another person to eat, bath, dress or use the toilet?**  
1 Yes / 2 No / 3 Don't know / 4 Refused

HU29

**HU30: Have you needed special equipment or tools to eat, bathe, dress or use the toilet?**  
1 Yes / 2 No / 3 Don't know / 4 Refused

HU30

**FEELINGS**

**HU31: During the past week, have you been feeling happy or unhappy?**  
1 Happy / 2 Unhappy (*Go to HU33*) / 3 Don't know / 4 Refused

HU31

**HU32: Would you describe yourself as having felt:**  
1 Happy and interested in life (*Go to HU34*) / 2 Somewhat happy (*Go to HU34*) / 3 Don't know / 4 Refused

HU32

**HU33: Would you describe yourself as having felt:**  
1 Somewhat unhappy / 2 Very unhappy / 3 So unhappy that life is not worthwhile / 4 Don't know / 5 Refused

HU33

**HU34: During the past week, did you ever feel fretful, angry, irritable, anxious or depressed?**  
1 Yes / 2 No (*Go to HU37*) / 3 Don't know / 4 Refused

HU34

**HU35: How often did you feel fretful, angry, irritable, anxious, or depressed?**  
1 Rarely / 2 Occasionally / 3 Often / 4 Almost always / 5 Don't know / 6 Refused

HU35

**HU36: During the past week did you feel extremely fretful, angry, irritable, anxious or depressed; to the point of needing professional help?**  
1 Yes / 2 No / 3 Don't know / 4 Refused

HU36

**MEMORY**

**HU37: How would you describe your ability to remember things during the past week?**  
1 Able to remember most things / 2 Somewhat forgetful / 3 Unable to remember anything at all / 4 Don't know / 5 Refused

HU37

**THINKING** \_\_\_\_\_

**HU38: How would you describe your ability to think and solve day to day problems, during the past week?**

1 Able to think clearly and solve problems/ 2 Had a little difficulty/ 3 Had some difficulty/ 4 Had a great deal of difficulty/ 5 Unable to think or solve problems/ 6 Don't know / 7 Refused

HU38

**PAIN AND DISCOMFORT** \_\_\_\_\_

**HU39: Have you had trouble with pain or discomfort during the past week?**

1 Yes/ 2 No (**GO TO HU41**) / 3 Don't know / 4 Refused

HU39

**HU40: How many of your activities, during the past week were limited by pain or discomfort?**

1 None/ 2 A few/ 3 Some/ 4 Most/ 5 All/ 6 Don't know / 7 Refused

HU40

**HU41: Overall, how would you rate your health during the past week?**

1 Excellent/ 2 Very good/ 3 Good/ 4 Fair/ 5 Poor/ 6 Don't know/ 7 Refused

HU41

**USE of MEDICAL SERVICES**

Read: I now want to ask you about your use of health services over the last three months. Please start by thinking of an event that happened about three months ago. Most of my questions will be about health services that you have used since that time. Can you remember something that you did or that happened to you about 3 months (90 days) ago?

**HV90: During the LAST 90 DAYS, did you ever visit a HOSPITAL of any kind to get any kind of medical care for yourself, including just seeing a doctor or nurse or just to get medication.**

1 Yes / 2 No (**SKIP TO NONHOS**) / 8 Don't know (**SKIP TO NONHOS**) / 9 Refused

IF NO, MAKE SURE NO HOSPITAL VISIT OF ANY KIND, even just a visit to see a nurse, doctor or just to get medication

HV90

**AD90: During the last 90 days, how many times did you go to a hospital and end up spending at least 24 hours in a bed or stretcher?**

Enter number of times admitted to hospital/ 00 No admissions/ 8 Don't know / 9 Refused

AD90

**EW90: During the last 90 days, how many times did you go to a hospital and end up spending less than 24 hours in a bed or stretcher, for example in an observation room, emergency room, or casualty room?**

Enter number of times admitted to hospital/ 00 No admissions/ 8 Don't know / 9 Refused

EW90

**OP90: During the last 90 days, how many times did you go to a hospital to see a doctor or a nurse as an outpatient (not an emergency room visit)**

Enter number of outpatient visits to a hospital/ **00** No outpatient visits/ **8** Don't know / **9** Refused

|  |  |      |
|--|--|------|
|  |  | OP90 |
|--|--|------|

**OP91: During the last 90 days, how many times did you go to a hospital to get medications?**

Enter number of visits to a hospital to get medication/ **00** No visits to hospital to get medication/ **8** Don't know/ **9** Refused

|  |  |      |
|--|--|------|
|  |  | OP91 |
|--|--|------|

**AD12: Before the times you visited a hospital during the last 90 days, how many OTHER times during the last YEAR did you spend at least one night in a hospital?**

Enter number of admissions/ **00** No admissions/ **8** Don't know/ **9** Refused

|  |  |      |
|--|--|------|
|  |  | AD12 |
|--|--|------|

Read: **Now I would like to ask about what happened during some of these visits to hospitals. Let's start with your most recent [hospital admission → observation room admission → outpatient visit. (If no visit within last 90 days or last year, skip to NONHOS)**

| USE OF HOSPITALS                                                                                                       | Most Recent Overnight Admission | Most Recent Observation Room or emergency room | Most Recent Routine Outpatient Visit |
|------------------------------------------------------------------------------------------------------------------------|---------------------------------|------------------------------------------------|--------------------------------------|
| <b>Name of hospital of most recent overnight admission.</b> Write <b>00</b> if no overnight admission                  | HNAD                            |                                                |                                      |
| <b>Name of hospital of most recent observation room visit</b><br>Write <b>00</b> if no observation room visit          | HNOP                            |                                                |                                      |
| <b>Name of hospital of most recent routine outpatient visit</b><br>Write <b>00</b> if no routine outpatient visit      | HNEW                            |                                                |                                      |
| <b>Can you remember the approximate date that you went?</b> DDMMYY<br>Enter 99 for any part not recalled               | ADDT                            | EWDT                                           | OPDT                                 |
| <b>Which type of health facility was it?</b><br>1 Public/ 2 Private for profit/ 3 Private charity                      | TYAD                            | TYEW                                           | TYOP                                 |
| <b>What level of hospital is this?</b><br>1 National referral / 2 District hospital / 3 Level-3 / 4 Level-4 / 66 Other | LVAD                            | LVEW                                           | LVOP                                 |



|                                                                                                                                                                                                                                                                                                                                                                                                        |      |      |      |
|--------------------------------------------------------------------------------------------------------------------------------------------------------------------------------------------------------------------------------------------------------------------------------------------------------------------------------------------------------------------------------------------------------|------|------|------|
| <p><b>What problem caused you to go to the hospital this time?</b><br/>                 Probe for the <b>primary</b> reason for visit: <b>1</b> Heart disease/ <b>2</b> Stroke/ <b>3</b> Kidney disease/ <b>4</b> Eye disease/ <b>5</b> Leg or foot ulcer/ <b>6</b> Cancer/ <b>7</b> Lung disease/ <b>8</b> Trauma/ <b>9</b> Diabetes/ <b>10</b> childbirth/ <b>66</b> Other/ <b>44</b> don't know</p> | P1AD | P1EW | P1OP |
| <p><b>Other reason, if any.</b> 99=if no secondary reason, otherwise codes as above</p>                                                                                                                                                                                                                                                                                                                | P2AD | P2EW | P2OP |
| <p><b>Other reason, if any.</b> 99=if no secondary reason, otherwise codes as above</p>                                                                                                                                                                                                                                                                                                                | P3AD | P3EW | P3OP |
| <p><b>IF ADMITTED FOR LESS THAN 24HOURS: How many hours did you spend at the hospital?</b><br/>                 Enter as decimal, e.g., 1.5 = 1 hour and 30 minutes/ Enter 99 if not recalled</p>                                                                                                                                                                                                      |      | DAEW | DAOP |
| <p><b>IF ADMITTED: How many nights did you spend in a ward?</b><br/>                 Enter number of nights/ <b>8</b> Don't know or can't remember/ <b>9</b> Refused</p>                                                                                                                                                                                                                               | NIWA |      |      |
| <p><b>IF ADMITTED: How many nights did you spend in ICU (intensive care unit)?</b> Check to see that ward nights + ICU nights = total nights.<br/>                 Enter number of nights/ <b>8</b> Don't know or can't remember/ <b>9</b> Refused</p>                                                                                                                                                 | NICU |      |      |
| <p><b>Did a doctor see you or only a nurse?</b> 1 doctor / 2 nurse / 8 Don't Know</p>                                                                                                                                                                                                                                                                                                                  | MDAD | MDEW | MDOP |
| <p><b>IF SAW A DOCTOR: How MANY specialist doctors or surgeons?</b><br/>                 99 if did not see any doctor / 8 do not know</p>                                                                                                                                                                                                                                                              | SPAD | SPEW | SPOP |
| <p><b>IF SAW A DOCTOR: How MANY primary care doctors?</b> 99 if did not see any doctor /8 do not know</p>                                                                                                                                                                                                                                                                                              | PCAD | PCEW | PCOP |
| <p><b>What tests or procedures were done?</b> Enter codes for ALL that occurred.<br/>                 1 blood test / 2 urine test / 3 x-ray or ultrasound / 4 major surgery / 5 minor surgery / 66 other</p>                                                                                                                                                                                           | TSAD | TSEW | TSOP |
| <p><b>Did you receive any pills, injections or infusions?</b><br/>                 Enter codes for ALL that occurred. 1 Pills / 2 Injections / 3 IV drips / 66 Other</p>                                                                                                                                                                                                                               | MEAD | MEEW | MEOP |
| <p><b>How long did it take to get to this hospital this time?</b><br/>                 Enter hours as decimal, e.g., 1.5 = 1 hour and 30 minutes/ 8 Don't know</p>                                                                                                                                                                                                                                     | TRAD | TREW | TROP |
| <p><b>How did you get to the hospital?</b> 1 walk / 2 bicycle / 3 scooter or motorcycle / 4 public bus or van / 5 private car / 6 taxi / 7 ambulance / 66 other / 8 don't know/ 9 refused</p>                                                                                                                                                                                                          | MOAD | MOEW | MOOP |
| <p><b>How many people went with you on this trip?</b><br/>                 Enter number of people/ 00 if patient went alone</p>                                                                                                                                                                                                                                                                        | PEAD | PEEW | PEOP |
| <p><b>How much did it cost to travel to the hospital?</b><br/>                 Enter ONE WAY amount in local currency for all persons who made this trip/ 777777 if cannot recall</p>                                                                                                                                                                                                                  | TCAD | TCEW | TCOP |

|                                                                                                                                                                                                                                                             |      |      |      |
|-------------------------------------------------------------------------------------------------------------------------------------------------------------------------------------------------------------------------------------------------------------|------|------|------|
| <b>How much did you and your family pay for unofficial costs that were not issued a receipt during this hospital visit?</b> 777777 If cannot recall                                                                                                         | PYAD | PYEW | PYPC |
| <b>How much did you and your family pay for everything that happened at this hospital visit?</b> (Include cost of medicine, tests done on you, food, fees paid to doctors and laboratory costs, and <b>exclude travel costs</b> ) / 777777 If cannot recall | PYAD | PYEW | PYOP |

**NONHOS:** Read **Now I want to ask about health care you received at places other than a hospital. Again, I only want to know about care you received within the last 90 days since [mention anchor event]. During the last 90 days, did you seek health care services from other places other than a hospital?**

1 Yes (FILL OUT NON-HOSPITAL VISITS TABLE)/ 2 No (GO TO NCD)/ 8 Don't know (GO TO NCD)/ 9 Refused

|        |
|--------|
| NONHOS |
|--------|

| Non-Hospital Visits                                                              | How many visits?<br>(LAST 90 DAYS) | Type (1 public / 2 private / 3 charity or NGO)** | Travel Time (ONE WAY, most recent visit, decimal hours) | Cost of travel (ONE WAY, most recent visit) | Total fees and charges* (most recent visit) |
|----------------------------------------------------------------------------------|------------------------------------|--------------------------------------------------|---------------------------------------------------------|---------------------------------------------|---------------------------------------------|
| Specialist Doctor or Surgeon                                                     | SP90                               | SPTY                                             | SPTT                                                    | SPTC                                        | SPCO                                        |
| Primary Care Doctor                                                              | PC90                               | PCTY                                             | PCTT                                                    | PCTC                                        | PCCO                                        |
| Nurse                                                                            | RN90                               | RNTY                                             | RNNT                                                    | RNTC                                        | RNCO                                        |
| Traditional Healer, including herbalists and fortune tellers, magicians, oracles | TH90                               | THTY                                             | THTT                                                    | THTC                                        | THCO                                        |
| Pharmacist or Dispensary                                                         | PH90                               | PHTY                                             | PHTT                                                    | PHTC                                        | PHCO                                        |
| Visit to a clinic to collect medication                                          | CL90                               | CLTY                                             | CLTT                                                    | CLTC                                        | CLCO                                        |
| Health Educator, such as a diabetes educator                                     | HE90                               | HETY                                             | HETT                                                    | HETC                                        | HECO                                        |
| Community Health Worker                                                          | CH90                               | CHTY                                             | CHTT                                                    | CHTC                                        | CHCO                                        |

\*Total fees and charges include all payments made by the respondent or the family for the medical **care that the respondent received**. Include any payments made after the visit. Include all payments for drugs, supplies, procedures and tests received. Do not include payments made by insurance, employers, or other organizations.

\*\*If patient reports having done MORE THAN one visit of a particular type, record information for the **most recent of these visits**.

**NCD: I will now read a list of health conditions that people sometimes have. Please tell me which ones a doctor has EVER said you have.**

1 Yes / 2 No / 8 Don't know/ 9 Refused

| Chronic health conditions                                           | Response |
|---------------------------------------------------------------------|----------|
| Heart attack                                                        | NCD1     |
| Heart Failure                                                       | NCD2     |
| Other heart disease                                                 | NCD3     |
| Stroke                                                              | NCD4     |
| High blood pressure                                                 | NCD5     |
| Cancer                                                              | NCD6     |
| Asthma                                                              | NCD7     |
| Other lung disease                                                  | NCD8     |
| HIV/AIDS                                                            | NCD9     |
| Erectile dysfunction or loss of libido                              | NCD10    |
| Kidney disease                                                      | NCD11    |
| Amputation of toe, foot, or leg                                     | NCD12    |
| Eye surgery                                                         | NCD13    |
| Peripheral neuropathy (pain, tingling, or numbness in legs or feet) | NCD14    |
| Foot or leg ulcer (sore that will not heal on its own)              | NCD15    |
| Laser treatment on your eyes                                        | NCD16    |
| Kidney dialysis                                                     | NCD17    |
| Depression                                                          | NCD18    |
| Other mental condition                                              | NCD19    |
| Other permanent problem you still have                              | NCD20    |

**INF: Now I want to ask about other temporary health problems that you have had. Within the last 90 days, since [mention anchor event], have you had...**

1 Yes/ 2 No/ 8 Don't know/ 9 Refused

| Time-limited conditions                                    | Response |
|------------------------------------------------------------|----------|
| Active Tuberculosis                                        | TD1      |
| Acute Episode of Malaria                                   | TD2      |
| Influenza (Flu)                                            | TD3      |
| Pneumonia                                                  | TD4      |
| Diarrhea lasting 3 or more days or requiring drip or pills | TD5      |
| Pregnancy or childbirth                                    | TD6      |
| Other major infection                                      | TD7      |
| Other major parasite                                       | TD8      |
| Injury                                                     | TD9      |
| "Cold" or other virus                                      | TD10     |
| Typhoid                                                    | TD11     |
| Cholera                                                    | TD12     |
| Other temporary illness                                    | TD13     |

**TST: During the LAST 90 DAYS (3 months), did someone perform any of these kinds of tests on you, including in a hospital? Do not count tests you did yourself**

1 Yes / 2 No / 8 Don't know / 9 Refused.

| Diabetes-Related Tests                   | Response |
|------------------------------------------|----------|
| Any urine test                           | TST1     |
| A test on your blood taken by needle     | TST2     |
| A finger-stick blood test                | TST3     |
| Blood pressure measurement (cuff on arm) | TST4     |
| An eye exam                              | TST5     |
| A test of your feet for feeling          | TST6     |
| Taking your weight on a scale            | TST7     |
| Measuring your waist with a tape         | TST8     |

**IMPACT OF HEALTH PROBLEMS**

**Now I would like to ask you how your health problems are affecting your life and the life of your family. Are YOUR health problems.**

For questions about respondent: 1 Yes / 2 No / 8 Does Not Apply/Don't Know/ 9 Refused

For questions about family members: 1 mother / 2 father / 3 brother / 4 sister / 5 girl child / 6 boy child / 7 girl grandchild / 8 boy grandchild / 10 husband/ 11 wife/ 66 other

In this table, family is NOT limited to persons with whom the respondent eats but also includes anyone related by blood or adoption.

|                                                                                                    | Respondent | Family Member | Family Member | Family Member |
|----------------------------------------------------------------------------------------------------|------------|---------------|---------------|---------------|
| Preventing you from doing <i>any</i> paying work?                                                  | IR1        |               |               |               |
| Keeping you from doing <i>as much</i> paying work as you would like?                               | IR2        |               |               |               |
| Making you do <i>more</i> paying work than you otherwise would?                                    | IR3        |               |               |               |
| Preventing some other person in your family from doing <i>any</i> paying work?                     |            | IF1A          | IF1B          | IF1C          |
| Keeping some other person in your family from doing <i>as much</i> paying work as they would like? |            | IF2A          | IF2B          | IF2C          |
| Making other family members do <i>more</i> paying work than they would like?                       |            | IF3A          | IF3B          | IF3C          |



**BTA: During the past 12 months, how did you pay for or get the medical services, care-givers, medicines, and medical supplies that you, yourself, used?**

1 Yes / 2 No / 8 Don't know/ 9 Refused

| Sources of funds                                                               | Response |
|--------------------------------------------------------------------------------|----------|
| By spending out of your current HOUSEHOLD income                               | BTA1     |
| Social welfare support                                                         | BTA2     |
| Donations of medicines or supplies by employers or agencies                    | BTA3     |
| With money or fundraising from friends or family who live with you or near you | BTA4     |
| With money or fundraising from family living abroad                            | BTA5     |
| From saved money, such as bank account savings                                 | BTA6     |
| By borrowing money                                                             | BTA7     |
| By selling possessions like furniture, animals, or jewelry                     | BTA8     |
| By selling housing or land                                                     | BTA 9    |

**ACC: Now I am going to read you a list of reasons why people sometimes do not get medical services when they want them. Please tell me which if any of these have prevented you from getting medicines or medical care, over the last 12 months: 1 Yes/ 2 No/ 8 Don't know/ 9 Refused**

| REASONS                                            | RESPONSE |
|----------------------------------------------------|----------|
| Lack of funds to pay for the care                  | ACC1     |
| Lack of transportation                             | ACC2     |
| No one to help me get there                        | ACC3     |
| Would have taken too long to go there/too far away | ACC4     |
| Would have had to wait too long once I was there   | ACC5     |
| Did not have health insurance                      | ACC6     |
| Too sick to make the trip                          | ACC7     |
| No doctor or other professional was available      | ACC8     |
| Medicines were not in stock                        | ACC9     |
| Did not trust the care                             | ACC10    |
| Did not know where to go                           | ACC11    |
| Some other reason                                  | ACC12    |

**SMOK: Do you smoke cigarettes, sniff or chew tobacco pipes or cigars?**

1 Yes/ 2 No/ 9 Refused

|      |
|------|
| SMOK |
|------|

**SMKP: If No, what is your past smoking history?**

1 Former smoker/ 77 Never smoker/ 9 Refused or unsure

|      |
|------|
| SMKP |
|------|

**SMKS: If you smoke, have you been advised by a health practitioner to stop smoking?**

1 [Does not smoke]/ 2 Yes (Advised to quit)/ 3 No/ 9 Refused or unsure

|      |
|------|
| SMKS |
|------|

**MEDICATIONS**

**ASPEN: Are you taking aspirin on daily basis?**

1 Yes/ 2 No/ 9 Refused

|       |
|-------|
| ASPEN |
|-------|

**MED: Are you currently taking any other pills or injections?**

1 Yes/ 2 No/ 9 Refused

|     |
|-----|
| MED |
|-----|

**IF YES, may I see the pills and injections you use and ask a few questions about them?**

Note: Have the respondent show you all the pills, insulin, and other medicines that he or she is currently taking. Fill in the chart for each of these.

| COMPOUND (MEDICINE), OR TYPE OF INSULIN, OR TYPE OF INSULIN SYRINGE OR PEN (IF NOT PRE-FILLED WITH INSULIN) | MG PER PILL OR INSULIN UNITS TAKEN PER DAY | # PILLS OR SHOTS PRESCRIBED PER DAY | # PILLS/ SHOTS TAKEN PER DAY, (WHEN TAKEN) | # DAYS/WEEK PILLS/ SHOTS TAKEN<br>1. EVERY DAY<br>2. 4-6 DAYS<br>3. 1-3 DAYS<br>4. < 1/WEEK | IF NOT TAKEN AS PRESCRIBED WHY NOT (PRIMARY REASON)<br>0. AS PRESCRIBED<br>1. SIDE EFFECTS<br>2. CANNOT AFFORD<br>3. FORGET<br>4. HARD TO GET<br>5. HELP NOT AVAILABLE<br>6. SYRINGE EQUIPMENT PROBLEMS<br>7. DON'T BELIEVE IT WORKS<br>8. DON'T NEED IT<br>8. DON'T KNOW<br>9. REFUSED | WHERE WAS THE MEDICATION OBTAINED?<br>1. PRIVATE/PHARMACY<br>2. HOSPITAL PHARMACY<br>3. CLINIC<br>4. PUBLIC OR STREET MARKET<br>5. RELATIVE OR FRIEND<br>6. OTHER<br>8. DON'T KNOW<br>9. REFUSED | HOW MUCH DID YOU PAY THE LAST TIME YOU BOUGHT THIS MEDICINE?<br><br>[IF COST OF MEDICINE WAS PART OF DOCTOR OR HOSPITAL FEE, ENTER 999] | HOW MANY PILLS OR UNITS OF INSULIN DID YOU GET? |
|-------------------------------------------------------------------------------------------------------------|--------------------------------------------|-------------------------------------|--------------------------------------------|---------------------------------------------------------------------------------------------|-----------------------------------------------------------------------------------------------------------------------------------------------------------------------------------------------------------------------------------------------------------------------------------------|--------------------------------------------------------------------------------------------------------------------------------------------------------------------------------------------------|-----------------------------------------------------------------------------------------------------------------------------------------|-------------------------------------------------|
| M1A                                                                                                         | M1B                                        | M1C                                 | M1D                                        | M1E                                                                                         | M1F                                                                                                                                                                                                                                                                                     | M1G                                                                                                                                                                                              | M1H                                                                                                                                     | M1I                                             |
| M2A                                                                                                         | M2B                                        | M2C                                 | M2D                                        | M2E                                                                                         | M2F                                                                                                                                                                                                                                                                                     | M2G                                                                                                                                                                                              | M2H                                                                                                                                     | M2I                                             |

|     |     |     |     |     |     |     |     |     |
|-----|-----|-----|-----|-----|-----|-----|-----|-----|
| M3A | M3B | M3C | M3D | M3E | M3F | M3G | M3H | M3I |
| M4A | M4B | M4C | M4D | M4E | M4F | M4G | M4H | M4I |
| M5A | M5B | M5C | M5D | M5E | M5F | M5G | M5H | M5I |
| M6A | M6B | M6C | M6D | M6E | M6F | M6G | M6H | M6I |
| M7A | M7B | M7C | M7D | M7E | M7F | M7G | M7H | M7I |
| M8A | M8B | M8C | M8D | M8E | M8F | M8G | M8H | M8I |
| M9A | M9B | M9C | M9D | M9E | M9F | M9G | M9H | M9I |

**QUESTIONS FOR PERSONS WITH DIABETES**

(If respondent does not have diabetes, skip to ETIM and conclude the interview.)

**DM2: For how many years have you had diabetes?**

99 if refuses or cannot make any estimate

|     |     |     |        |
|-----|-----|-----|--------|
| _ _ | Yrs | _ _ | Months |
| DM2 |     |     |        |

**DM3: During the LAST 90 DAYS, did you test your own blood sugar?**

1 Yes (CONTINUE TO DM3AA)/ 2 No (GO TO DM4)/ 9 Refused

|     |
|-----|
| DM3 |
|-----|

**DM3AA: During the LAST 90 DAYS, how often did you test your own blood sugar?**

1 More than twice a day/ 2 Twice a day/ 3 Once a day/ 4 Once or twice a week/ 5 Less than once a week/ 6 Once a month/ 7 Once in 3 months

|       |
|-------|
| DM3AA |
|-------|

**DM3A: How many blood sugar testing strips did you receive, the last time you got some?**

Use leading zeros. /666 do not do home testing (GO TO DM4) /8 Don't know/ 9 refused

|      |
|------|
| DM3A |
|------|

**DM3B: How much did you pay for these blood sugar testing strips?**

Use leading zeros /666 do not do home testing (GO TO DM4) /8 don't know/ 9 Refused

|       |
|-------|
| _ _ _ |
| DM3B  |



**DM3C: Where did you get these testing strips?**

1 Private doctor or clinic / 2 Public doctor or clinic / 3 Private pharmacy or dispensary / 4 Other / 8 don't know/ 9 Refused

DM3C

**DM3D: Over the last year, have you been able to get all the testing strips you needed, when you needed them?**

1 Yes, always/ 2 Most of the time/ 3 Usually not/ 55 Never

DM3D

**DM4: During the LAST 90 DAYS, how often has someone else measured your blood sugar, not counting tests your family did for you?**

1 More than twice a day/ 2 Twice a day/ 3 Once a day/ 4 Once or twice a week/ 5 Less than once a week/6 Once a month/ 7 Once in 3 months/ 55 Never

DM4

**DM5: When the cost of blood sugar test is separate from hospitals, clinics or doctors visits cost, how much do you usually pay to have someone perform one blood sugar test?**

Use leading zeros / 666 no test performed /8 don't know/ 9 refused

Payment per test:

|  |  |  |  |  |  |  |  |  |  |  |  |
|--|--|--|--|--|--|--|--|--|--|--|--|
|  |  |  |  |  |  |  |  |  |  |  |  |
|--|--|--|--|--|--|--|--|--|--|--|--|

DM5

**DM6: Have you injected insulin at home or in a nearby clinic during the last 90 days?**

1 Yes, I inject myself at home (go to DM6H)/ 2 Yes, I get shots at a clinic (go to ETIM)/ 3 No (go to DM6A)/ 8 Don't know/ 9 Refused.

DM6

**DM6A: What are your main reasons for not using insulin?**

1 Yes / 2 No / 8 Don't know/ 9 Refused

| Reasons for not using insulin ( Then go to ETIM )           | Response |
|-------------------------------------------------------------|----------|
| Insulin not prescribed by my doctor                         | INS1     |
| Insulin too expensive—I cannot afford to buy it             | INS2     |
| Insulin not available or in stock in pharmacy or clinic     | INS3     |
| Insulin too weak, too strong, or adulterated (poor quality) | INS4     |
| Syringes not in stock in pharmacy or clinic near my home    | INS5     |
| Syringes too expensive—I cannot afford to buy them          | INS6     |
| Afraid of or dislike needles                                | INS7     |
| Don't how to inject insulin properly                        | INS8     |
| Don't know when to inject insulin                           | INS9     |
| Doctor prescribed it but I don't think I need it            | INS10    |
| Cannot find or afford blood sugar testing supplies          | INS11    |
| Doctor or nurse not available in the clinic                 | INS12    |
| Other reason                                                | INS13    |
| Don't know or refused                                       | INS14    |

Respondent ID \_\_\_\_\_

**DM6H: During the last 90 days, on how many days did you fail to inject your insulin because you did not have usable syringes or needles?** 1 never/ 2 5 days or fewer/ 3 6-10 days/ 4 11-20 days/ 5 21-45 days/ 6 more than half the time/ 7 always (did not inject insulin last 90 days because did not have syringes)/ 8 don't know/ 9 refused.

|      |
|------|
| DM6H |
|------|

**DM6I: During the last 90 days, about how many times did you re-use each needle, to give yourself insulin?** 1 never (I always used a new needle for each injection)/ 2 Twice/ 3 three times/ 4 four times/ 5 five times or more/ 8 don't know/ 9 refused

|      |
|------|
| DM6I |
|------|

**ETIM: Ending time:**  
24 hour clock

|      |         |      |
|------|---------|------|
| _ _  | _ _     | ETIM |
| Hour | Minutes |      |
